# Supplementary material
Source: MDPI journal article supplement (https://www.mdpi.com/2311-7524/8/7/581)
Supplement: s1 [file s1]

**Additional information:**

NMR data for *trans*-verbascoside are as follows:  $^1\text{H}$  NMR (500 MHz, methanol- $\text{d}_4$ )  $\delta$  (ppm) 7.59 (d,  $J$  = 15.9 Hz, 1H), 7.05 (d,  $J$  = 2.0 Hz, 1H), 6.95 (dd,  $J$  = 8.2, 2.0 Hz, 1H), 6.78 (d,  $J$  = 8.2 Hz, 1H), 6.69 (d,  $J$  = 2.0 Hz, 1H), 6.67 (d,  $J$  = 8.0 Hz, 1H), 6.56 (dd,  $J$  = 8.0, 2.0 Hz, 1H), 6.27 (d,  $J$  = 15.9 Hz, 1H), 5.19 (s, 1H), 4.94-4.92 (m, 1H), 4.38 (d,  $J$  = 7.9 Hz, 1H), 4.10-4.02 (m, 1H), 3.92 (dd,  $J$  = 3.2, 1.8 Hz, 1H), 3.82 (t,  $J$  = 9.1 Hz, 1H), 3.74-3.71 (m, 1H), 3.64-3.61 (m, 1H), 3.59-3.50 (m, 4H), 3.38 (t,  $J$  = 9.1 Hz, 1H), 3.30-3.27 (m, 1H), 2.80 (td,  $J$  = 7.5, 3.7 Hz, 2H), 1.09 (d,  $J$  = 6.2 Hz, 3H). The obtained NMR data were in correspondence with available literature (Rungsimakan *et al.* Rowan, 2014).

NMR data for *trans*-teupolioside are as follows:  $^1\text{H}$  NMR (500 MHz, methanol- $\text{d}_4$ )  $\delta$  (ppm) 7.60 (d,  $J$  = 15.9 Hz, 1H), 7.06 (d,  $J$  = 2.1 Hz, 1H), 6.96 (dd,  $J$  = 8.2, 2.1 Hz, 1H), 6.79 (d,  $J$  = 8.2 Hz, 1H), 6.72 (d,  $J$  = 2.2 Hz, 1H), 6.68 (d,  $J$  = 8.0 Hz, 1H), 6.57 (dd,  $J$  = 8.0, 2.2 Hz, 1H), 6.28 (d,  $J$  = 15.9 Hz, 1H), 5.57 (d,  $J$  = 1.7 Hz, 1H), 4.92 (t,  $J$  = 9.3 Hz, 1H), 4.38 (d,  $J$  = 7.9 Hz, 1H), 4.36 (d,  $J$  = 7.7 Hz, 1H), 4.08-4.02 (m, 1H), 3.99 (dd,  $J$  = 3.5, 1.7 Hz, 1H), 3.82 (dd,  $J$  = 11.4, 7.1 Hz, 1H), 3.81-3.79 (m, 1H), 3.77 (t,  $J$  = 9.3 Hz, 1H), 3.74-3.69 (m, 2H), 3.66 (dd,  $J$  = 9.6, 3.5 Hz, 1H), 3.65-3.61 (m, 1H), 3.58 (dd,  $J$  = 9.7, 7.7 Hz, 1H), 3.56-3.50 (m, 4H), 3.47 (dd,  $J$  = 9.7, 3.4 Hz, 1H), 3.38 (dd,  $J$  = 9.3, 7.9 Hz, 1H), 3.28 (t,  $J$  = 9.6 Hz, 1H), 2.79 (td,  $J$  = 7.1, 3.4 Hz, 2H), 1.05 (d,  $J$  = 6.2 Hz, 3H).  $^{13}\text{C}$  NMR (125 MHz, from HSQC experiment methanol- $\text{d}_4$ )  $\delta$  (ppm) 123.0 (CH), 121.1 (CH), 116.9 (CH), 116.3 (CH), 116.1 (CH), 114.9 (CH), 114.3 (CH), 107.2 (CH), 103.8 (CH), 102.1 (CH), 82.8 (CH), 82.7 (CH), 76.7 (CH), 75.8 (CH), 75.7 (CH), 74.6 (CH), 73.9 (CH), 72.6 (CH), 72.0 (CH<sub>2</sub>), 71.6 (CH), 70.2 (2xCH), 70.1 (CH), 62.6 (CH<sub>2</sub>), 62.1 (CH<sub>2</sub>), 36.2 (CH<sub>2</sub>), 18.2 (CH<sub>3</sub>). The obtained NMR data were in correspondence with available literature (Budzianowski *et al.* Skrzypczak, 1995).
